# Supplementary material
Source: Springer Nature journal article supplement (https://www.springermedizin.de/resource/supplementary/12939_2012_350_MOESM4_ESM.pdf/9550956)
Supplement: MOESM4 [file 9550956]

| Year | District                                                                     | Upazila                                           | Union                                          | Village                                        | Respondents<br>(mothers who had an pregnancy outcome in last year) | Total Sample                                           |
|------|------------------------------------------------------------------------------|---------------------------------------------------|------------------------------------------------|------------------------------------------------|--------------------------------------------------------------------|--------------------------------------------------------|
| 2008 | Purposive selection of 5 districts<br>3 intervention and 2 control districts | Random selection of 6 upazilas from each district | Random selection of 2 unions from each upazila | Random selection of 5 villages from each union | Random selection of 10 respondents per village                     | $(6 \times 2 \times 5 \times 10)$<br>=600 per district |
| 2010 |                                                                              |                                                   |                                                |                                                | Random selection of 7 respondents per village                      | $(6 \times 2 \times 5 \times 7)$<br>=420 per district  |
